# Supplementary material for: Production of L-Malic Acid by Metabolically Engineered Aspergillus nidulans Based on Efficient CRISPR–Cas9 and Cre-loxP Systems
Source: MDPI journal article supplement (doi:10.3390/jof9070719), 2023-06-30
Supplement: s1 [file s1]

Table S1 Primers used in this study

| Name              | Sequence                                         | Intention                                                                                                                                    |
|-------------------|--------------------------------------------------|----------------------------------------------------------------------------------------------------------------------------------------------|
| Psk529-F1         | CCCTTATTCGAGCTCGGTAC                             | for amplifying <i>loxP-Cre-Pxy/p-loxP-trpC</i> fragment                                                                                      |
| Psk529-R          | CCTTCCAAGCTTGCATGCCT                             | for amplifying <i>loxP-Cre-Pxy/p-loxP-trpC</i> fragment                                                                                      |
| O-cre loxp-F      | ATACACCGGGCAAAGTTATC                             | for amplifying <i>pzero-Cre-loxP</i> fragment                                                                                                |
| O-cre loxp-R      | GATCTAAGAAGGATTACCTCTAAAC                        | for amplifying <i>pzero-Cre-loxP</i> fragment                                                                                                |
| O-cre loxp-pyro-F | GGTAATCCTTCTTAGATCTTGGCGGGTAAGTCAGATAA           | for amplifying <i>pyroA</i> fragment                                                                                                         |
| O-cre loxp-pyro-R | GATAACTTTGCCCGGTGTATCTGACTTGACGCTTCTCT           | for amplifying <i>pyroA</i> fragment                                                                                                         |
| 0-gpdA-F          | AATTAACCTCACTAAAGGGATCGATAAGCTTGATTAAG<br>GTTC   | for amplifying <i>PgpdA</i> fragment                                                                                                         |
| 0-gpdA-R          | TTTAAACCTGCAGGACTAGTGCATGCGGAGAGACGGAC<br>GG     | for amplifying <i>PgpdA</i> fragment                                                                                                         |
| 0-tef-F           | TAACCCTCACTAAAGGGGTGAAGTTGTGTTATG                | for amplifying <i>Ptef</i> fragment                                                                                                          |
| 0-tef-R           | AACCTGCAGGACTAGTGAGACAGCAGAATCACCGCC             | for amplifying <i>Ptef</i> fragment; as the common R primer for diagnosing <i>Ptef-dctA</i> , <i>Ptef-pyc</i> and <i>Ptef-mdhC</i> cassettes |
| 0-pyc-F           | AATTAACCTCACTAAAGGGCATAACTACTAAGGATGAAC<br>CACTG | for amplifying <i>Pgpd-pyc</i> fragment; diagnostic primer for <i>Ptef-pyc</i> cassette                                                      |
| gpd-pyc-R         | CTTTAATCAAGCTTATCGATATGGCTTCCATTGTACCACAC        | for amplifying <i>Pgpd-pyc</i> fragment                                                                                                      |
| Tef-pyc-R         | CATAACACAACCTTCACCATGGCTTCCATTGTACC              | for amplifying <i>Ptef-pyc</i> fragment                                                                                                      |
| 0-mdhC-F          | TAACCCTCACTAAAGGGTTACTTTGGTGGGGGACTCTGA<br>G     | for amplifying <i>Ptef-mdhC</i> fragment; diagnostic primer for <i>Ptef-mdhC</i> cassette                                                    |
| tef-mdhC-R        | CATAACACAACCTTCACCATGGTCAAGGCTGGTATGTCG<br>AC    | for amplifying <i>Ptef-mdhC</i> fragment                                                                                                     |
| 0-DctA-F          | AATTAACCTCACTAAAGGGCGATACATCCGAGATGGA<br>CATG    | for amplifying <i>dctA</i> fragment; diagnostic primer for <i>Ptef-dctA</i> cassette                                                         |
| Tef-DctA-R        | CATAACACAACCTTCACCATGTTGAAAACGTCCCTTAC<br>C      | for amplifying <i>dctA</i> fragment                                                                                                          |
| T7-gc-oahA-F      | TAATACGACTCACTATAGGGCGGAGTTTGGAGGCAGGTT          | for the DNA template of oahA-sgRNA (RNA); for                                                                                                |

|               |                                                               |                                                                                           |
|---------------|---------------------------------------------------------------|-------------------------------------------------------------------------------------------|
|               | TTAGAGCTAGAAATAGCA                                            | deleting <i>oahA</i>                                                                      |
| Oah-0-gpc-F   | GCATACAGCATTCACAAAATGAACACCGCTGCAGAATTAA<br>CCCTCACTAAAGGG    | for the repair template of constructing <i>Pgpd-ycp</i><br>overexpression                 |
| Oah-0-gpc-R   | TCAATGCGCTTCCGAGCTTGCACGGCAGCCCGCTTCCTT<br>CCAAGCTTGCATGCC    | for the repair template of constructing <i>Pgpd/Ptef-ycp</i><br>overexpression            |
| OahA-yz-F     | CTCCACGCTTAAGCATCC                                            | diagnostic primer for $\Delta oahA$ and <i>ycp</i> overexpression                         |
| OahA-yz-R     | CCTGGAATACCATCGCGCTTGAG                                       | diagnostic primer for $\Delta oahA$ and <i>ycp</i> overexpression                         |
| T7-gc-cexA-F  | TAATACGACTCACTATAGGGTCGCCACAAACACCACGTTT<br>TAGAGCTAGAAATAGCA | for the DNA template of <i>cexA</i> -sgRNA (RNA); for<br>deleting <i>cexA</i>             |
| Cex-o-tmc-F   | GGAGATTAGTATGGATCAATGCTCATTGGCCAGAATTAAAC<br>CCTCACTAAAGGG    | for the repair template of constructing <i>Ptef-mdhC</i><br>overexpression                |
| Cex-o-tmc-R-1 | GTGAAGACCGAATATGGAACCTCGCCGGTGCTTCCTTCC<br>AAGCTTGCATGCC      | for the repair template of constructing <i>Ptef-mdhC</i><br>overexpression                |
| Cex-yz-F      | GGCTCGATCTTCGTGCCAACGA                                        | diagnostic primer for $\Delta cexA$ and <i>mdhC</i><br>overexpression                     |
| Cex-yz-R      | AGGAACCAAGAAAGCACCGGCA                                        | diagnostic primer for $\Delta cexA$ and <i>mdhC</i><br>overexpression                     |
| RT-dctA-F     | GACTATCTGCGAGCGTTAC                                           | qRT-PCR primer                                                                            |
| RT-dctA-R     | GGTCGATGATGTACTGCG                                            | qRT-PCR primer                                                                            |
| RT-ycp-F      | GCCATCATGCAGTTCAGAAGA                                         | qRT-PCR primer                                                                            |
| RT-ycp-R      | CCAATCATATAGGCCTCGTCAGC                                       | qRT-PCR primer                                                                            |
| RT-mdhC-F     | GCTTGCTCTCTACGATATCCGC                                        | qRT-PCR primer                                                                            |
| RT-mdhC-R     | GTAGCCCTTAACGGTGCTGTTAG                                       | qRT-PCR primer                                                                            |
| T7-dct-yw-F:  | TAATACGACTCACTATAGGGGATTGAAGCTGAGGCGGT<br>TTTAGAGCTAGAAATAGCA | for the DNA template of <i>dctA</i> -sgRNA (RNA); for<br>deleting <i>dctA</i> promoter    |
| Dct-clp-F:    | CCTCACTGGCTTTTACTTCTTCTACCTGCCGCGGCCGCG<br>AATTGGCCCTTC       | for the repair template of constructing <i>Ptef-dctA</i> in<br><i>situ</i> overexpression |
| Dct-yw-R:     | AGACTGGGGTAAGGGGACGTTTTCGAACATGGTGAAGG<br>TTGTGTTATGTTTGTGG   | for the repair template of constructing <i>Ptef-dctA</i> in<br><i>situ</i> overexpression |

|                        |                        |                                                                 |
|------------------------|------------------------|-----------------------------------------------------------------|
|                        |                        | <i>situ</i> overexpression                                      |
| Dct-clp- <i>yz</i> -F: | GCAGATCACTGCTCCACTCTCT | diagnostic primer for <i>dctA</i> <i>in situ</i> overexpression |
| Dct-clp- <i>yz</i> -R: | CAGGCCTCCTGTGCTCATGGTC | diagnostic primer for <i>dctA</i> <i>in situ</i> overexpression |
